# Supplementary material
Source: bioRxiv or medRxiv preprint supplement (https://medrxiv.org/highwire/filestream/73177/field_highwire_adjunct_files/0/2020.03.03.20023994-1.pdf)

Supplementary Table 1: Univariate odds ratios for Parkinson's disease for the 32 common items on the US and UK versions of the University of Pennsylvania Smell Identification Test

| Odour         | OR (95% CI)         | p-value                |
|---------------|---------------------|------------------------|
| Pizza         | 0.20 (0.16 to 0.24) | $6.82 \times 10^{-55}$ |
| Bubblegum     | 0.24 (0.19 to 0.29) | $1.38 \times 10^{-44}$ |
| Menthol       | 0.07 (0.05 to 0.10) | $6.16 \times 10^{-58}$ |
| Cherry        | 0.15 (0.12 to 0.18) | $4.26 \times 10^{-68}$ |
| Motor oil     | 0.20 (0.17 to 0.25) | $3.39 \times 10^{-52}$ |
| Mint          | 0.24 (0.20 to 0.30) | $4.46 \times 10^{-39}$ |
| Banana        | 0.19 (0.15 to 0.24) | $3.98 \times 10^{-50}$ |
| Clove         | 0.08 (0.06 to 0.11) | $1.16 \times 10^{-67}$ |
| Leather       | 0.12 (0.09 to 0.17) | $6.06 \times 10^{-39}$ |
| Coconut       | 0.13 (0.10 to 0.16) | $1.03 \times 10^{-71}$ |
| Onion         | 0.17 (0.13 to 0.24) | $2.49 \times 10^{-27}$ |
| Cinnamon      | 0.11 (0.09 to 0.14) | $7.84 \times 10^{-78}$ |
| Gasoline      | 0.05 (0.04 to 0.07) | $7.39 \times 10^{-99}$ |
| Strawberry    | 0.34 (0.28 to 0.42) | $8.84 \times 10^{-26}$ |
| Cedar         | 0.23 (0.19 to 0.29) | $7.09 \times 10^{-44}$ |
| Chocolate     | 0.37 (0.30 to 0.46) | $1.24 \times 10^{-19}$ |
| Lilac         | 0.14 (0.10 to 0.19) | $6.40 \times 10^{-40}$ |
| Turpentine    | 0.51 (0.42 to 0.63) | $1.21 \times 10^{-10}$ |
| Peach         | 0.13 (0.10 to 0.16) | $1.90 \times 10^{-49}$ |
| Pineapple     | 0.10 (0.07 to 0.13) | $7.11 \times 10^{-69}$ |
| Lime          | 0.79 (0.66 to 0.96) | 0.0182                 |
| Orange        | 0.14 (0.11 to 0.18) | $2.41 \times 10^{-55}$ |
| Watermelon    | 0.06 (0.04 to 0.08) | $3.98 \times 10^{-85}$ |
| Paint thinner | 0.16 (0.13 to 0.20) | $1.13 \times 10^{-64}$ |
| Grass         | 0.65 (0.54 to 0.78) | $6.90 \times 10^{-6}$  |
| Smoke         | 0.11 (0.08 to 0.16) | $1.06 \times 10^{-33}$ |
| Pineapple     | 0.21 (0.17 to 0.26) | $4.30 \times 10^{-43}$ |
| Lemon         | 0.12 (0.09 to 0.14) | $1.23 \times 10^{-87}$ |
| Soap          | 0.08 (0.06 to 0.10) | $3.62 \times 10^{-87}$ |
| Natural gas   | 0.07 (0.05 to 0.09) | $1.97 \times 10^{-68}$ |
| Rose          | 0.09 (0.07 to 0.12) | $1.44 \times 10^{-79}$ |
| Peanut        | 0.15 (0.12 to 0.20) | $4.33 \times 10^{-47}$ |

Supplementary Table 2: Results of multivariate logistic regression analyses of the four odours that discriminated most between those with and without hyposmia, plus a further two odours that most discriminated between Parkinson's disease and controls from previous work [Joseph et al 2019, Auger et al 2020]

| Odour    | Model based on previously identified odours |                          |                        | Likelihood ratio test statistics between nested models |                        |
|----------|---------------------------------------------|--------------------------|------------------------|--------------------------------------------------------|------------------------|
|          | Coefficient                                 | OR (95% CI)              | p-value                | $\chi^2$                                               | p-value                |
| Coconut  | -1.342963                                   | 0.26 (0.2 to 0.34)       | $1.46 \times 10^{-21}$ | 383.69                                                 | $1.96 \times 10^{-85}$ |
| Cherry   | -1.330007                                   | 0.26 (0.2 to 0.34)       | $3.07 \times 10^{-23}$ | 447.60                                                 | $2.40 \times 10^{-99}$ |
| Clove    | -1.422969                                   | 0.24 (0.17 to 0.33)      | $1.63 \times 10^{-17}$ | 345.69                                                 | $3.68 \times 10^{-77}$ |
| Menthol  | -1.594804                                   | 0.2 (0.14 to 0.29)       | $1.20 \times 10^{-17}$ | 226.32                                                 | $3.78 \times 10^{-51}$ |
| Orange   | -0.9652192                                  | 0.38 (0.28 to 0.52)      | $6.56 \times 10^{-10}$ | 162.71                                                 | $2.90 \times 10^{-37}$ |
| Onion    | -0.554275                                   | 0.57 (0.38 to 0.86)      | 0.0076                 | 124.20                                                 | $7.60 \times 10^{-29}$ |
| Constant | 5.32388                                     | 205.18 (117.7 to 357.68) | $1.19 \times 10^{-78}$ |                                                        |                        |

Supplementary Table 3: Univariate odds ratios for Parkinson's disease (PD) for the items in the REM sleep behaviour disorder screening questionnaire

| RBDSQ question                                                                                                                    | OR (95% CI)          | p-value                |
|-----------------------------------------------------------------------------------------------------------------------------------|----------------------|------------------------|
| 1. I sometimes have very vivid dreams                                                                                             | 0.76 (0.64 to 0.90)  | 0.0017                 |
| 2. My dreams frequently have an aggressive or action-packed content                                                               | 1.97 (1.59 to 2.45)  | 5.11×10 <sup>-10</sup> |
| 3. The dream contents mostly match my nocturnal behaviour                                                                         | 4.28 (3.34 to 5.49)  | 1.44×10 <sup>-30</sup> |
| 4. I know that my arms or legs move when I sleep                                                                                  | 2.86 (2.36 to 3.47)  | 7.05×10 <sup>-27</sup> |
| 5. It thereby happened that I (almost) hurt my bed partner or myself                                                              | 9.57 (6.81 to 13.45) | 1.38×10 <sup>-38</sup> |
| 6. I have or had any of the following phenomena during my dreams:                                                                 | 3.20 (2.64 to 3.88)  | 3.90×10 <sup>-32</sup> |
| 6.1 Speaking, shouting, laughing very loudly                                                                                      | 2.90 (2.36 to 3.55)  | 1.71×10 <sup>-24</sup> |
| 6.2 Sudden limb movements, "fights"                                                                                               | 4.34 (3.08 to 6.11)  | 4.00×10 <sup>-17</sup> |
| 6.3 Gestures, complex movements that are useless during sleep, e.g., to wave, to salute, to fighten mosquitoes, falls off the bed | 5.76 (3.98 to 8.32)  | 1.37×10 <sup>-20</sup> |
| 6.4 Things that fell down around the bed, e.g. bedside lamp, book, glasses                                                        | 2.82 (2.23 to 3.55)  | 2.53×10 <sup>-18</sup> |
| 7. It happens that my movements awake me                                                                                          | 0.91 (0.76 to 1.08)  | 0.2822                 |
| 8. After awakening I mostly remember the content of my dreams well                                                                | 1.11 (0.93 to 1.33)  | 0.2343                 |
| 9. My sleep is frequently disturbed                                                                                               |                      |                        |

Supplementary Table 4: Marker parameters for the BRAIN test kinesia score (delta KS) and akinesia time (multiple of the median [MoM] AT) among Parkinson's disease (PD) patients and controls.

|                                     | <b>PD</b>    | <b>Control</b> |
|-------------------------------------|--------------|----------------|
| KS Delta values                     |              |                |
| Mean                                | -12.80       | 0              |
| Standard deviation                  | 11.62        | 9.94           |
| Truncation limits                   | -30 to 10    |                |
| AT MoM values                       |              |                |
| Mean ( $\log_e$ )                   | 0.3087       | 0              |
| Standard deviation ( $\log_e$ )     | 0.3876       | 0.2701         |
| Truncation limits                   | 0.747 to 3.0 |                |
| Correlation coefficients between KS |              |                |
| Delta values and AT MoM values      | -0.5626      | -0.3487        |

Supplementary Figure 1: Distribution of likelihood ratios among Parkinson's disease (PD) cases and controls (A), and the observed detection rate according to false-positive rate (receiver operating characteristic curve; B) for the logistic regression model based on the four odours that discriminated most between those with and without hyposmia from previous work, plus a further two odours that most discriminated between PD and controls. [Joseph et al 2019, Auger et al 2020]:

A)

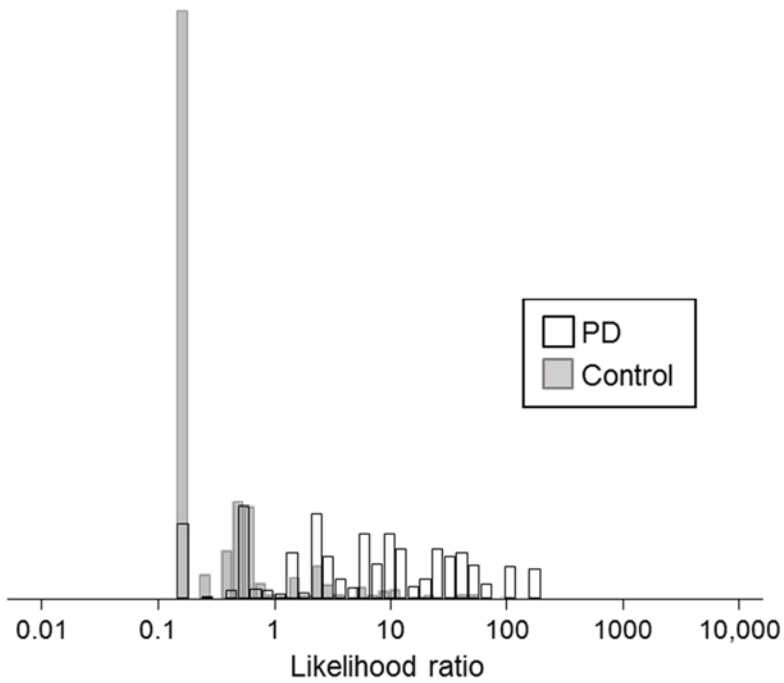

B)

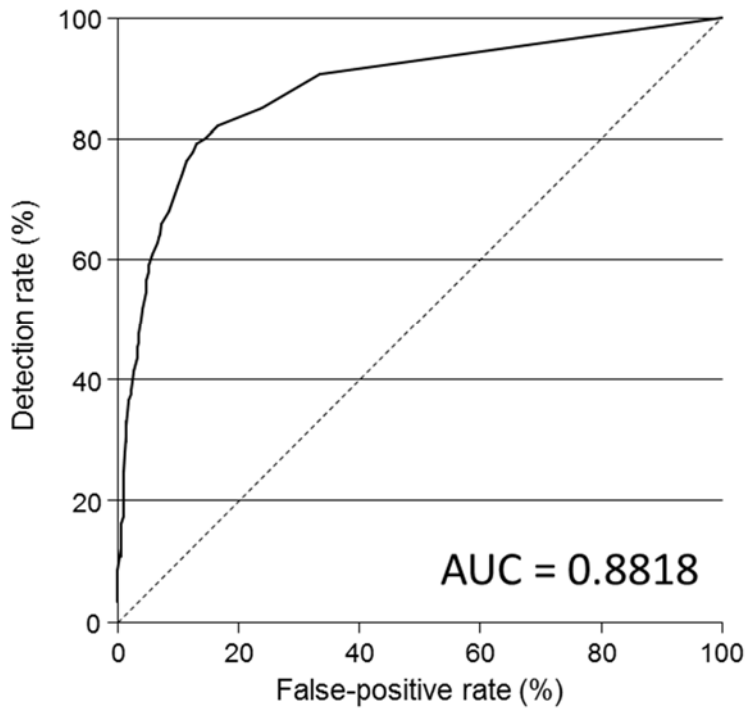

AUC; area under the receiver operating characteristic curve

Supplementary Figure 2: Distributions of delta UPSIT scores (observed score minus expected score according to age and gender) among Parkinson's disease (PD) patients and controls (A), the likelihood ratio according to delta UPSIT scores with dashed lines indicate where truncation is applied (B), the observed detection rate according to false-positive rate (receiver operating characteristic curve) for delta UPSIT values (C)

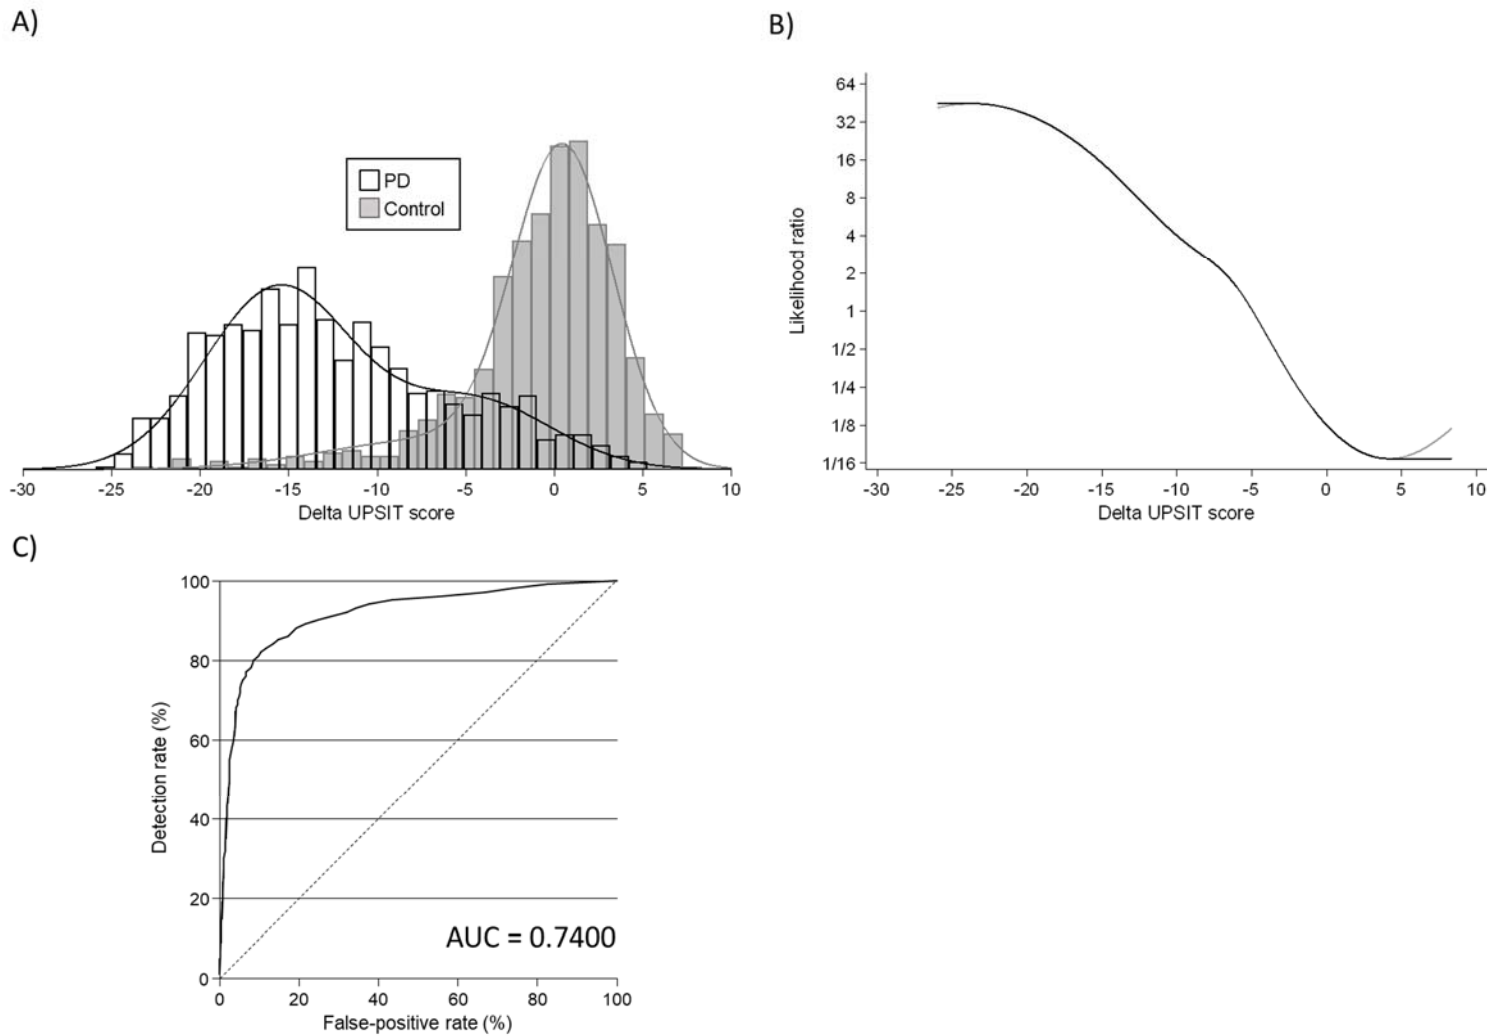

AUC; area under the receiver operating characteristic curve

Supplementary Figure 3: Distributions of REM sleep behaviour screening questionnaire (RBDSQ) scores among Parkinson's disease (PD) patients and controls (A), the likelihood ratio according to RBDSQ scores (B) and the observed detection rate according to false-positive rate (receiver operating characteristic curve) for RBDSQ scores (C)

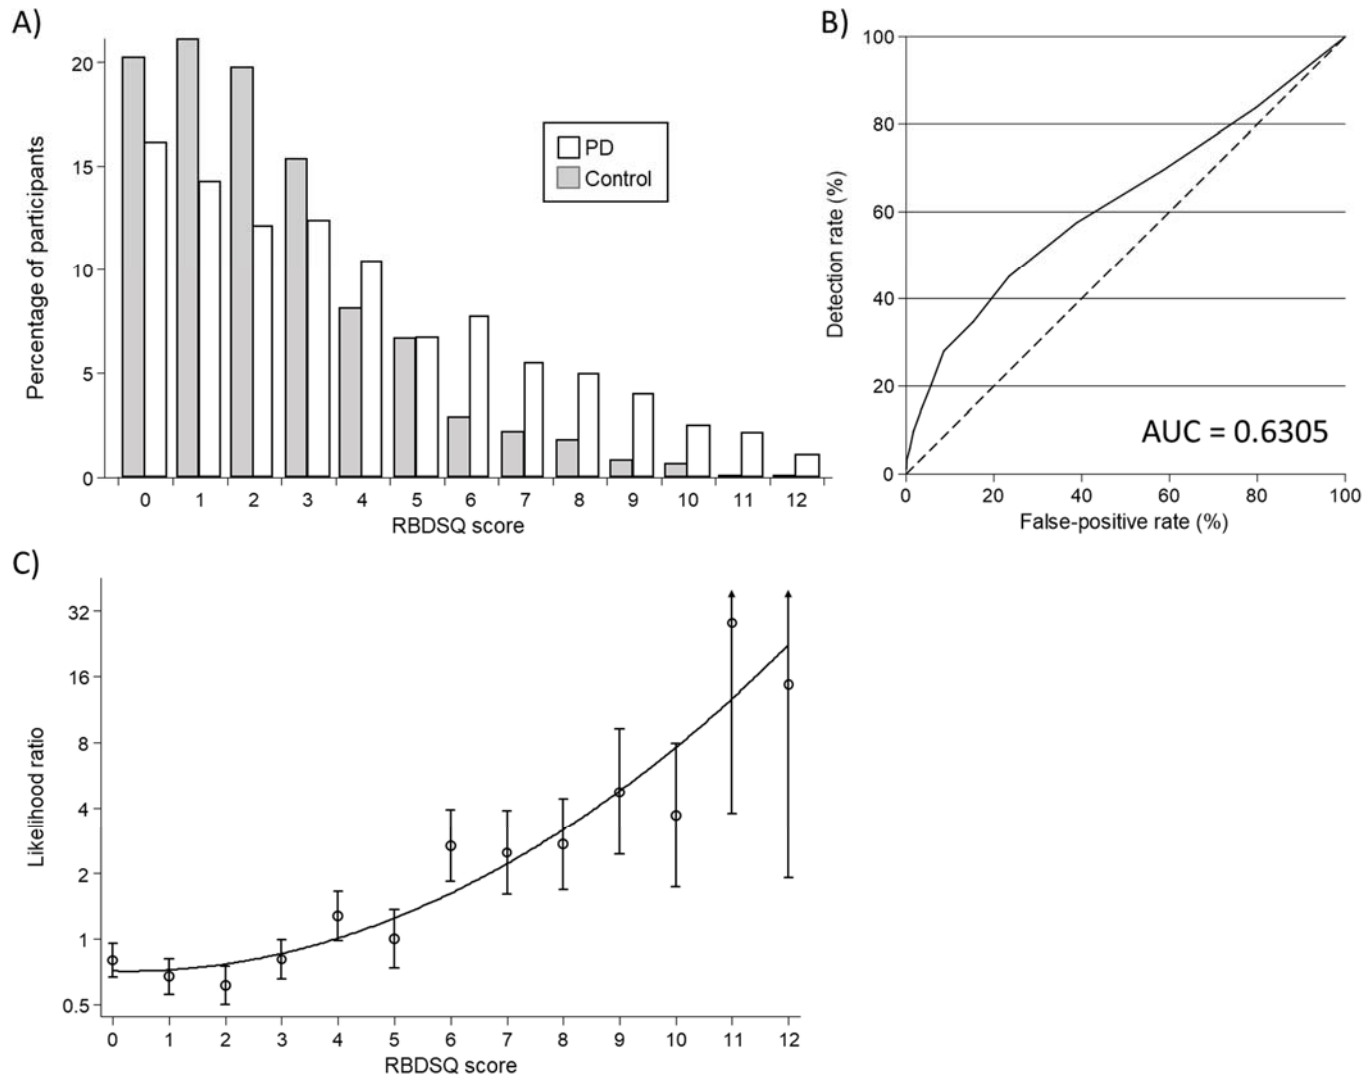

AUC; area under the receiver operating characteristic curve

Supplementary Figure 4: Probability plots of delta kinesia scores (KS) (A) and akinesia time (AT) multiple of the median (MoM) values (B) among Parkinson's disease (PD) patients and controls.

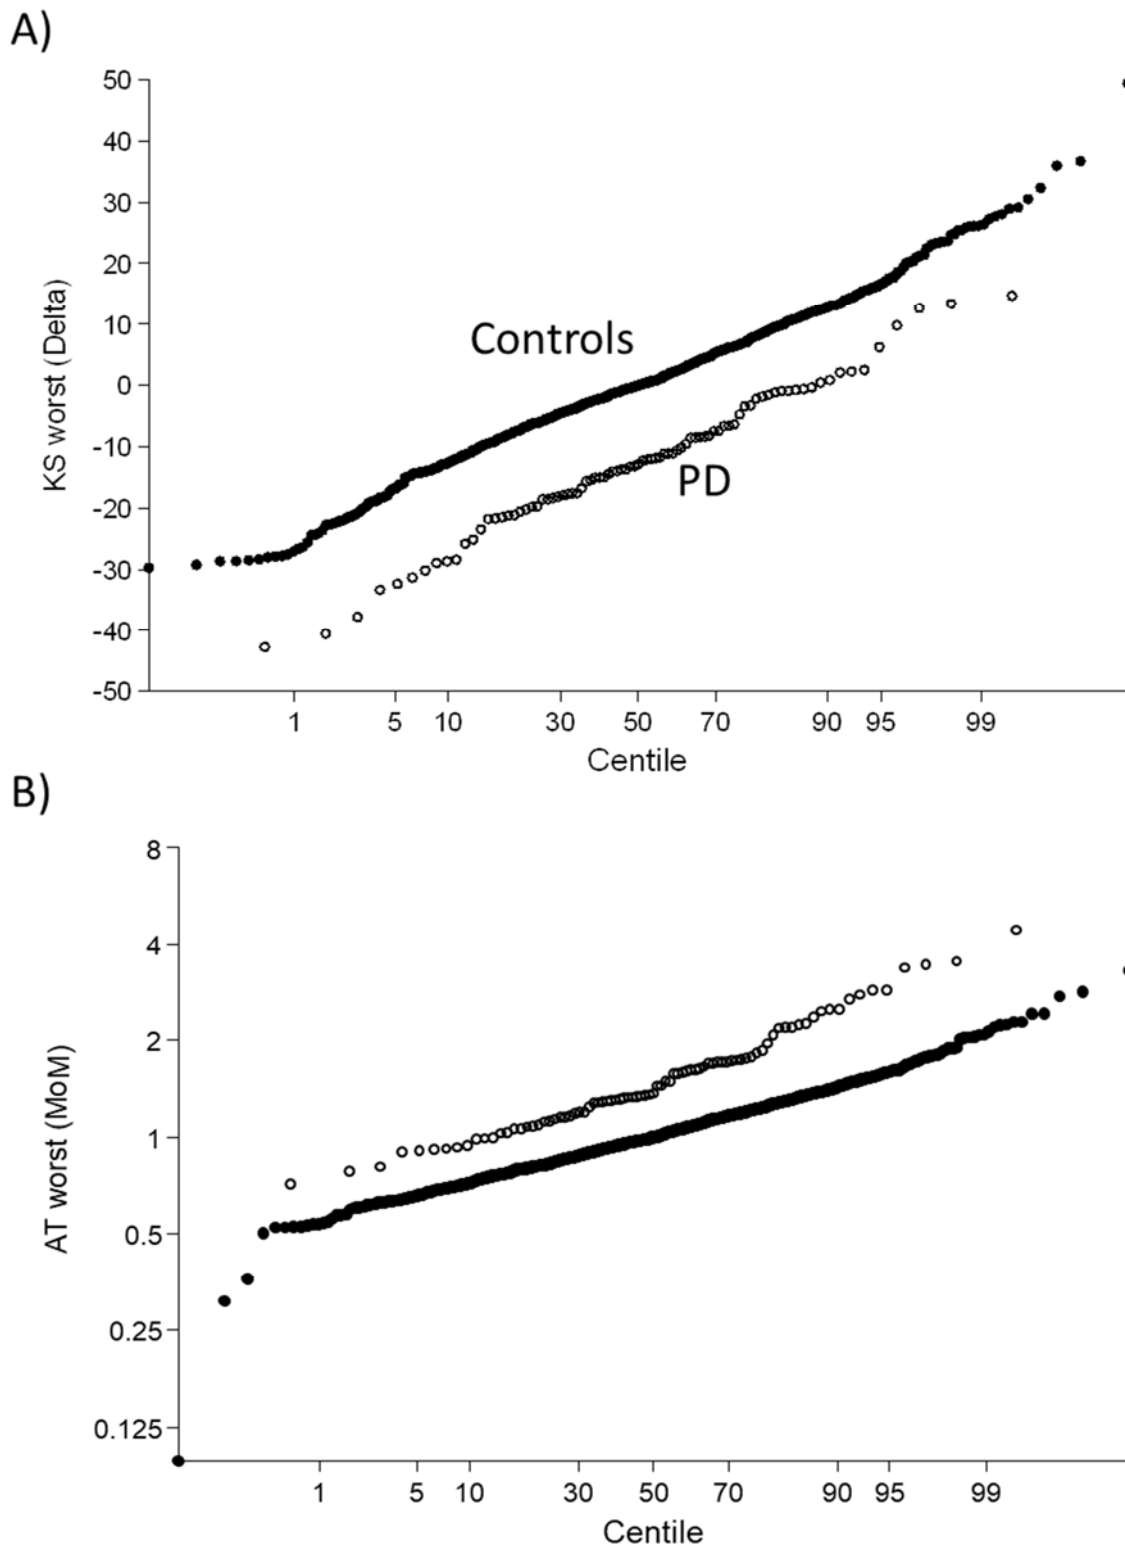

Supplement: Supplementary file [file 2020.03.03.20023994-1.pdf]
